# Supplementary material for: Distinct Bacterial Microbiomes in Sexual and Asexual Potamopyrgus antipodarum, a New Zealand Freshwater Snail
Source: PLOS journal article supplement (doi:10.1371/journal.pone.0161050), 2016-08-26
Supplement: S3 (10.1371/journal.pone.0161050.s003) [file journal.pone.0161050.s003]

**S1 Table. List and description of samples.**

| <b>SampleID</b> | <b>Lake</b> | <b>Replicate</b> | <b>Pooled or Individual Snail</b> | <b>Sex</b> | <b>Ploidy</b> | <b>Inferred Reproductive Mode</b> | <b>Section</b> | <b>Source</b> |
|-----------------|-------------|------------------|-----------------------------------|------------|---------------|-----------------------------------|----------------|---------------|
| AFB             | Alexandrina | Alexandrina      | Pooled                            | Female     | 2X            | Sexual                            | Body           | LL            |
| AFH             | Alexandrina | Alexandrina      | Pooled                            | Female     | 2X            | Sexual                            | Head           | LL            |
| AMB             | Alexandrina | Alexandrina      | Pooled                            | Male       | 2X            | Sexual                            | Body           | LL            |
| AMH             | Alexandrina | Alexandrina      | Pooled                            | Male       | 2X            | Sexual                            | Head           | LL            |
| I1FB            | Ianthe      | Ianthe-1         | Individual                        | Female     | 2X            | Sexual                            | Body           | Field         |
| I1FH            | Ianthe      | Ianthe-1         | Individual                        | Female     | 2X            | Sexual                            | Head           | Field         |
| I1MB            | Ianthe      | Ianthe-1         | Individual                        | Male       | 2X            | Sexual                            | Body           | Field         |
| I1MH            | Ianthe      | Ianthe-1         | Individual                        | Male       | 2X            | Sexual                            | Head           | Field         |
| I2FB            | Ianthe      | Ianthe-2         | Individual                        | Female     | 2X            | Sexual                            | Body           | Field         |
| I2FH            | Ianthe      | Ianthe-2         | Individual                        | Female     | 2X            | Sexual                            | Head           | Field         |
| I2MB            | Ianthe      | Ianthe-2         | Individual                        | Male       | 2X            | Sexual                            | Body           | Field         |
| I2MH            | Ianthe      | Ianthe-2         | Individual                        | Male       | 2X            | Sexual                            | Head           | Field         |
| I3FB            | Ianthe      | Ianthe-3         | Individual                        | Female     | 2X            | Sexual                            | Body           | Field         |
| I3FH            | Ianthe      | Ianthe-3         | Individual                        | Female     | 2X            | Sexual                            | Head           | Field         |
| I3MB            | Ianthe      | Ianthe-3         | Individual                        | Male       | 2X            | Sexual                            | Body           | Field         |
| I3MH            | Ianthe      | Ianthe-3         | Individual                        | Male       | 2X            | Sexual                            | Head           | Field         |
| I4FB            | Ianthe      | Ianthe-4         | Individual                        | Female     | 2X            | Sexual                            | Body           | Field         |
| I4FH            | Ianthe      | Ianthe-4         | Individual                        | Female     | 2X            | Sexual                            | Head           | Field         |
| I4MB            | Ianthe      | Ianthe-4         | Individual                        | Male       | 2X            | Sexual                            | Body           | Field         |
| I4MH            | Ianthe      | Ianthe-4         | Individual                        | Male       | 2X            | Sexual                            | Head           | Field         |
| K1FB            | Kaniere     | Kaniere-1        | Pooled                            | Female     | 2X            | Sexual                            | Body           | Field         |
| K1FH            | Kaniere     | Kaniere-1        | Pooled                            | Female     | 2X            | Sexual                            | Head           | Field         |
| K1MB            | Kaniere     | Kaniere-1        | Pooled                            | Male       | 2X            | Sexual                            | Body           | Field         |
| K1MH            | Kaniere     | Kaniere-1        | Pooled                            | Male       | 2X            | Sexual                            | Head           | Field         |
| KFB             | Kaniere     | Kaniere          | Pooled                            | Female     | 2X            | Sexual                            | Body           | LL            |
| KFH             | Kaniere     | Kaniere          | Pooled                            | Female     | 2X            | Sexual                            | Head           | LL            |
| KMB             | Kaniere     | Kaniere          | Pooled                            | Male       | 2X            | Sexual                            | Body           | LL            |
| KMH             | Kaniere     | Kaniere          | Pooled                            | Male       | 2X            | Sexual                            | Head           | LL            |
| P3FB            | Poerua      | Poerua-3         | Pooled                            | Female     | 3X            | Asexual                           | Body           | LL            |
| P3FH            | Poerua      | Poerua-3         | Pooled                            | Female     | 3X            | Asexual                           | Head           | LL            |
| P3MB            | Poerua      | Poerua-3         | Pooled                            | Male       | 3X            | Asexual                           | Body           | LL            |
| P3MH            | Poerua      | Poerua-3         | Pooled                            | Male       | 3X            | Asexual                           | Head           | LL            |
| P4FB            | Poerua      | Poerua-4         | Pooled                            | Female     | 3X            | Asexual                           | Body           | LL            |
| P4FH            | Poerua      | Poerua-4         | Pooled                            | Female     | 3X            | Asexual                           | Head           | LL            |
| P4MB            | Poerua      | Poerua-4         | Pooled                            | Male       | 3X            | Asexual                           | Body           | LL            |
| P4MH            | Poerua      | Poerua-4         | Pooled                            | Male       | 3X            | Asexual                           | Head           | LL            |

|       |         |                  |            |          |    |         |          |       |
|-------|---------|------------------|------------|----------|----|---------|----------|-------|
| SA1   | Sarah   | Sarah-Adult-1    | Individual | Female   | 3X | Asexual | Adult    | Field |
| SA2   | Sarah   | Sarah-Adult-2    | Individual | Female   | 3X | Asexual | Adult    | Field |
| SA3   | Sarah   | Sarah-Adult-3    | Individual | Female   | 3X | Asexual | Adult    | Field |
| SA4   | Sarah   | Sarah-Adult-4    | Individual | Female   | 3X | Asexual | Adult    | Field |
| SJ1   | Sarah   | Sarah-Juvenile-1 | Individual | Juvenile | 3X | Asexual | Juvenile | Field |
| SJ2   | Sarah   | Sarah-Juvenile-2 | Individual | Juvenile | 3X | Asexual | Juvenile | Field |
| SJ3   | Sarah   | Sarah-Juvenile-3 | Individual | Juvenile | 3X | Asexual | Juvenile | Field |
| SJ4   | Sarah   | Sarah-Juvenile-4 | Individual | Juvenile | 3X | Asexual | Juvenile | Field |
| T4FB  | Taylor  | Taylor-4         | Pooled     | Female   | 3X | Asexual | Body     | LL    |
| T4FH  | Taylor  | Taylor-4         | Pooled     | Female   | 3X | Asexual | Head     | LL    |
| T4MB  | Taylor  | Taylor-4         | Pooled     | Male     | 3X | Asexual | Body     | LL    |
| T4MH  | Taylor  | Taylor-4         | Pooled     | Male     | 3X | Asexual | Head     | LL    |
| G10FB | Gunn    | Gunn-10          | Pooled     | Female   | 4X | Asexual | Body     | LL    |
| G10FH | Gunn    | Gunn-10          | Pooled     | Female   | 4X | Asexual | Head     | LL    |
| G10MB | Gunn    | Gunn-10          | Pooled     | Male     | 4X | Asexual | Body     | LL    |
| G10MH | Gunn    | Gunn-10          | Pooled     | Male     | 4X | Asexual | Head     | LL    |
| G14FB | Gunn    | Gunn-14          | Pooled     | Female   | 4X | Asexual | Body     | LL    |
| G14FH | Gunn    | Gunn-14          | Pooled     | Female   | 4X | Asexual | Head     | LL    |
| G14MB | Gunn    | Gunn-14          | Pooled     | Male     | 4X | Asexual | Body     | LL    |
| G14MH | Gunn    | Gunn-14          | Pooled     | Male     | 4X | Asexual | Head     | LL    |
| R6FB  | Rotoiti | Rotoiti-6        | Pooled     | Female   | 4X | Asexual | Body     | LL    |
| R6FH  | Rotoiti | Rotoiti-6        | Pooled     | Female   | 4X | Asexual | Head     | LL    |
| R6MB  | Rotoiti | Rotoiti-6        | Pooled     | Male     | 4X | Asexual | Body     | LL    |
| R6MH  | Rotoiti | Rotoiti-6        | Pooled     | Male     | 4X | Asexual | Head     | LL    |

LL=laboratory lineage Field=field collected
